# Supplementary material for: Secondary organic aerosol formation from photooxidation of furan:effects of NO&lt;sub&gt;x&lt;/sub&gt; level and humidity
Source: Copernicus journal article supplement (doi:10.5194/acp-2018-477), 2018-06-25
Supplement: Supplementary file 1 [file acp-2018-477-supplement.pdf]

# **Secondary organic aerosol formation from photooxidation of furan: effects of NO<sub>x</sub> level and humidity**

Xiaotong Jiang<sup>1</sup>, Narcisse T. Tsona<sup>1</sup>, Long Jia<sup>2</sup>, Shijie Liu<sup>1</sup>, Yongfu Xu<sup>2</sup>, Lin Du<sup>1</sup>

<sup>1</sup>Environment Research Institute, Shandong University, Qingdao, 266237, China

<sup>2</sup>State Key Laboratory of Atmospheric Boundary Layer Physics and Atmospheric Chemistry, Institute of Atmospheric Physics, Chinese Academy of Sciences, Beijing, 100029, China

*Correspondence to:* Lin Du ([lindu@sdu.edu.cn](mailto:lindu@sdu.edu.cn))

## **Supplementary material**

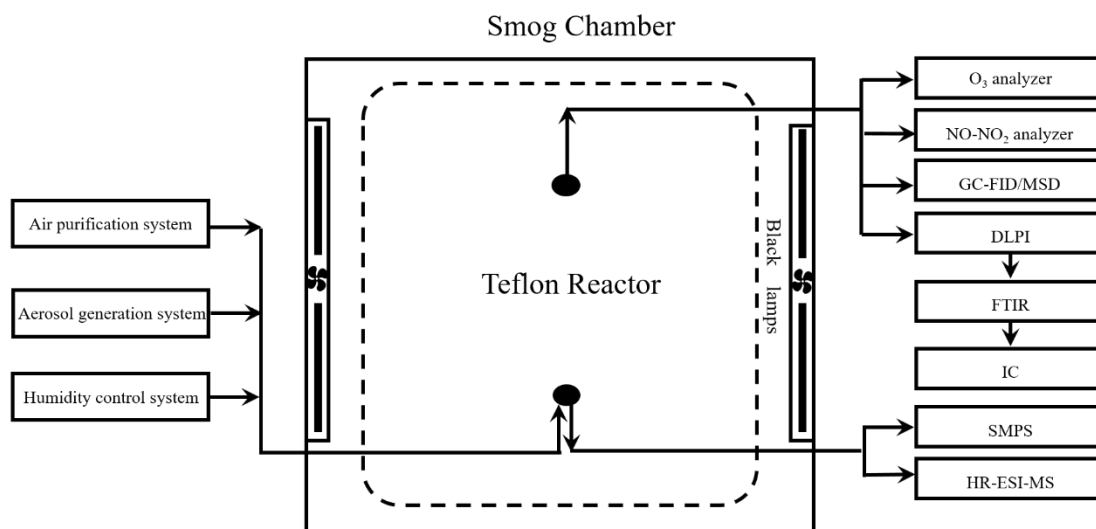

Figure S1: Schematic of the experimental set-up employed in this study.

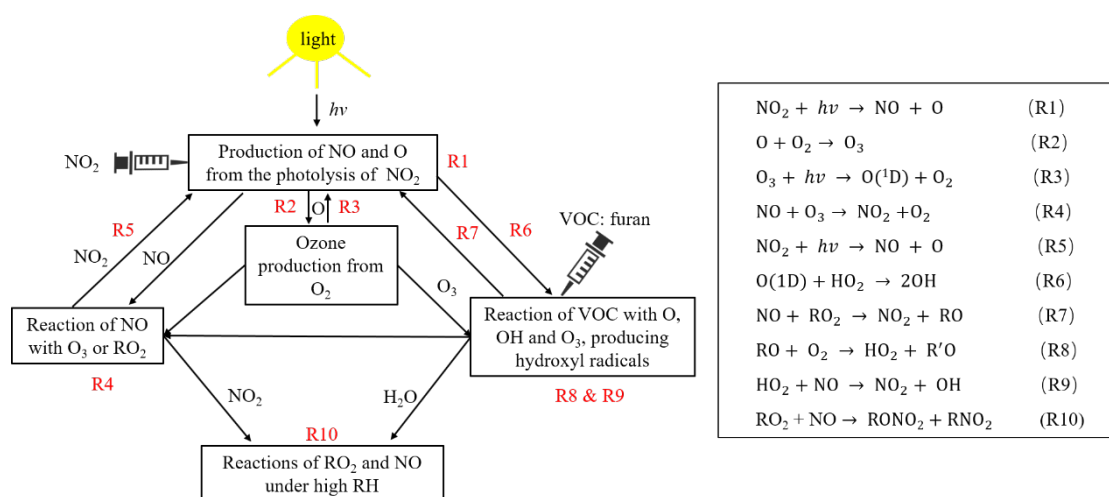

Figure S2: Major gas phase inorganic chemical reactions during the experiments.

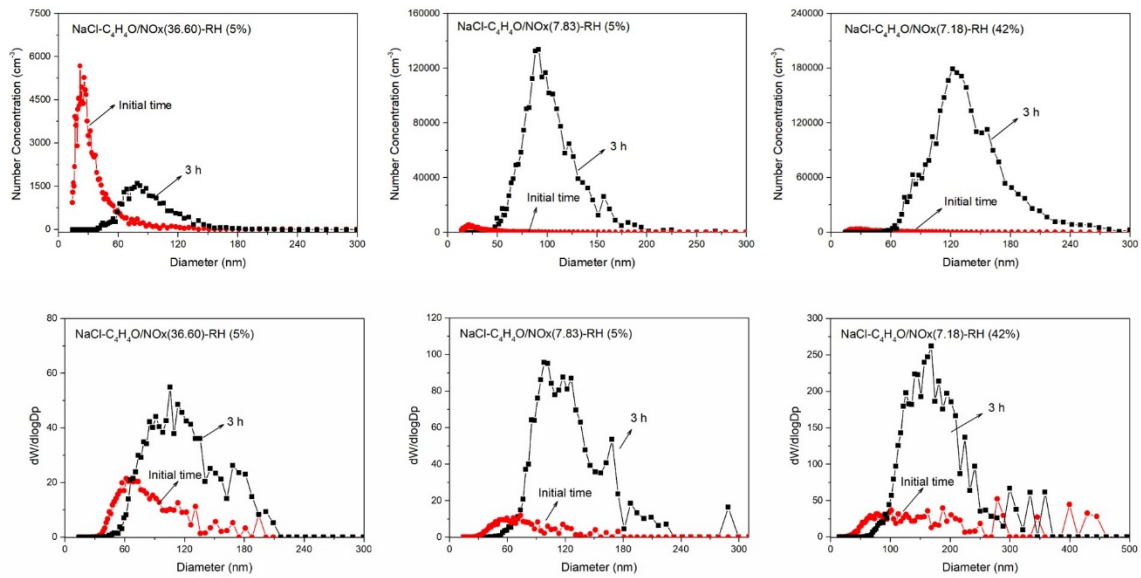

Figure S3: Variations of particle size distribution of number and mass concentrations in the beginning of the experiment and at the 3-h time point under different experimental conditions. Since the particle wall loss has a weak RH dependence in our chamber, a mean value  $4.7 \times 10^{-5} \text{ s}^{-1}$  wall loss correction was used. A density of  $1.4 \text{ g m}^{-3}$  was used in SMPS.

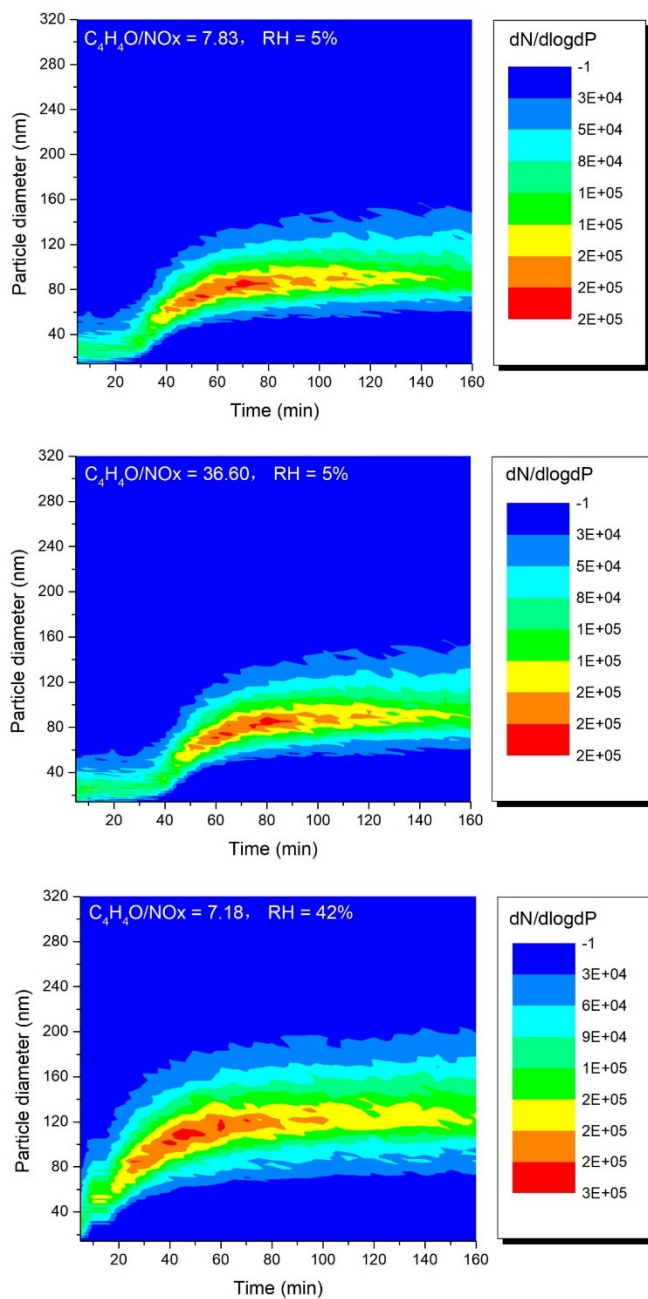

Figure S4: Contour plots of SOA bursts formed under different experimental conditions.

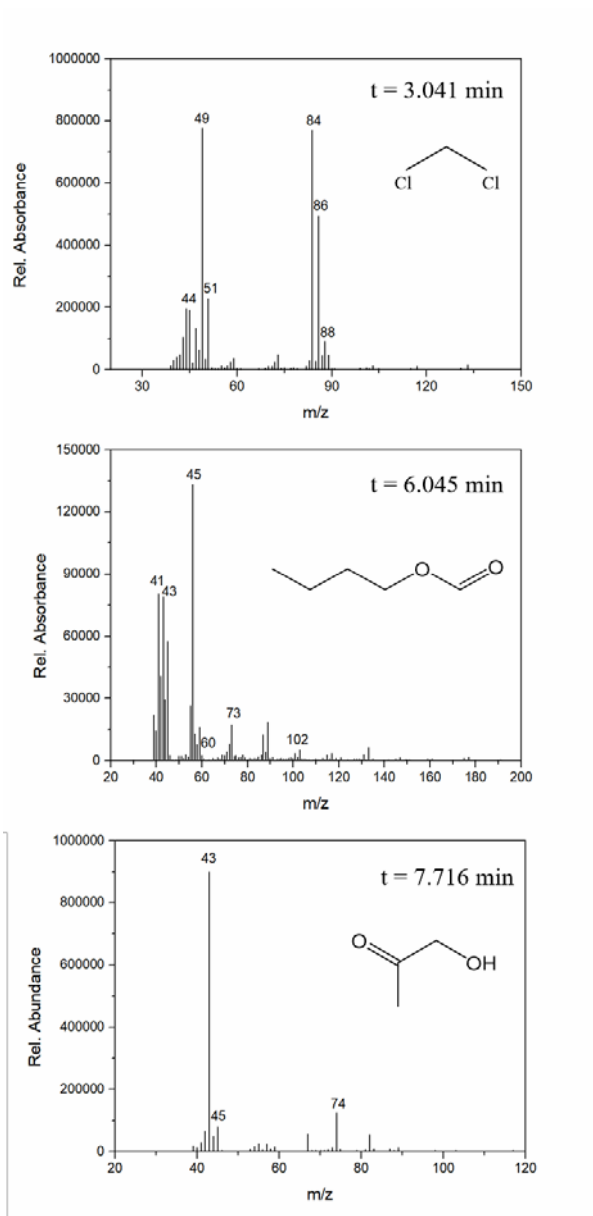

Figure S5: GC-MS spectra of gas phase products formed from the photooxidation of furan.

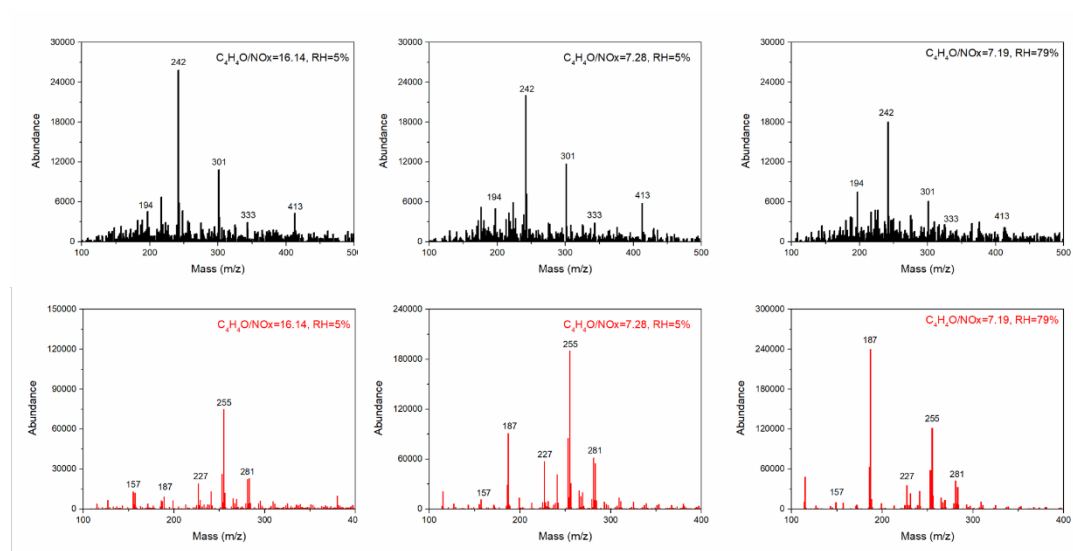

Figure S6: Background-subtracting mass spectra of SOA in both positive ion mode (black) and negative ion mode (red) from the photooxidation of furan under different experimental conditions.
